# Supplementary material for: Nickel(ii) and copper(ii) complexes with pyridine-containing macrocycles bearing an aminopropyl pendant arm: synthesis, characterization, and modifications of the pendant amino groupElectronic supplementary information (ESI) available: colour versions of Figs. 4, 5 and 7. See http://www.rsc.org/suppdata/dt/b2/b211489e/
Source: Royal Society of Chemistry journal article supplement (doi:10.1039/b211489e), 2003-02-03
Supplement: b211489e.pdf [file b211489e.pdf]

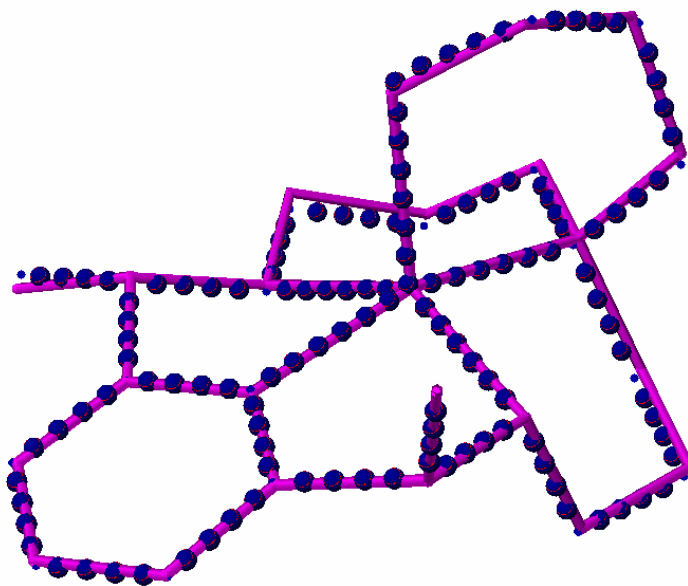

**Figure 4.** Overlay of X-ray structure of  $[\text{Ni}(\text{L2b})]^{2+}$  (solid) and  $[\text{Cu}(\text{L2b})]^{2+}$  (dotted). The atom numbering scheme (identical for both complexes) is the same as that shown in Fig 2.

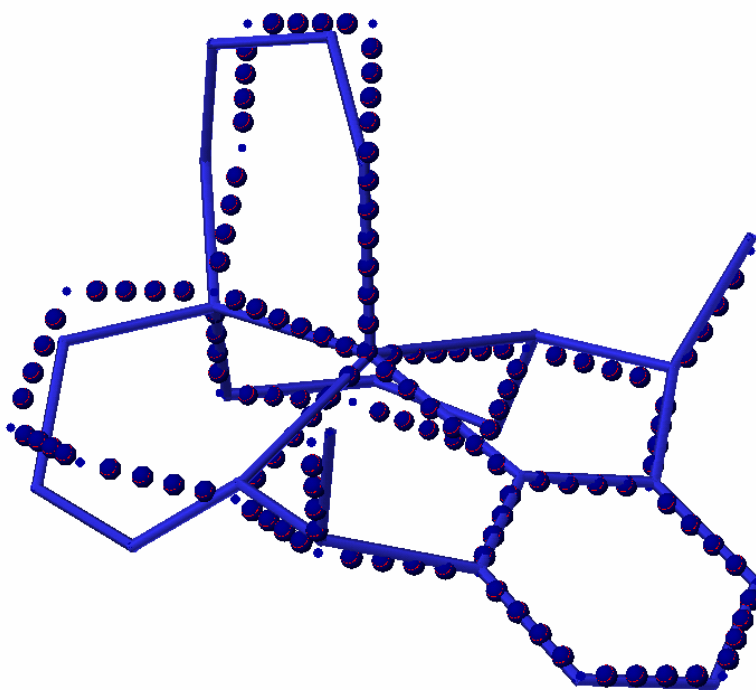

**Figure 5.** Overlay of X-ray structure of  $[\text{Ni}(\text{L2a})]^{2+}$  (solid) and  $[\text{Cu}(\text{L2a})]^{2+}$  (dotted). The atom numbering scheme (identical for both complexes) is the same as that shown in Fig 1.

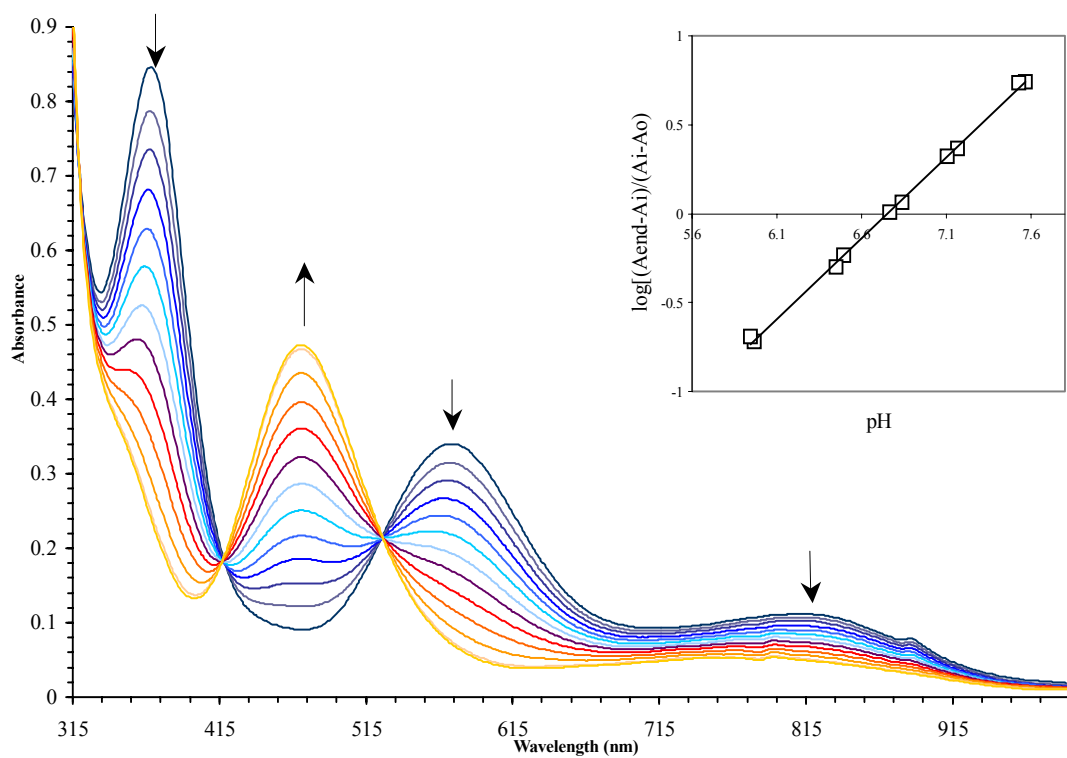

**Figure 7.** UV- Visible spectrum of the arm on/off behavior of  $[\text{Ni}(\text{L2a})]^{2+}$ . Concentration of initial  $[\text{Ni}(\text{L2a})](\text{ClO}_4)_2$  solution 0.006 M. The initial 2 mL of solution was titrated with 12 additions of 0.5  $\mu\text{L}$  of 1.100 M  $\text{HClO}_4$ . The final acid concentration was 0.003 M.
